# Supplementary material
Source: Royal Society of Chemistry journal article supplement (doi:10.1039/d6ta00625f)
Supplement: d6ta00625f1.pdf [file d6ta00625f1.pdf]

## Supporting information

### **Ligand-Length Engineering in Isoreticular Fe-MOFs Enables Efficient Ciprofloxacin Degradation**

Hanqi Li,<sup>†a</sup> Xinyan Qiu,<sup>†a</sup> Shiyu Yuan,<sup>a</sup> Yanyi Lu,<sup>a</sup> Xiaoran Yan,<sup>a</sup> Yuzheng Guo,<sup>c,d</sup> Zhuo Jiang,<sup>a,b\*</sup>

- a. School of Electrical Engineering and Automation, Wuhan University, Wuhan 430072, China.
- b. Shenzhen Research Institute of Wuhan University, Shenzhen 518057, China.
- c. School of Power and Mechanical Engineering, Wuhan University, Wuhan 430072, China.
- d. Hubei Key Laboratory of Electronic Manufacturing and Packaging Integration, Wuhan University, Wuhan 430072, China.

† Hanqi Li and Xinyan Qiu contributed equally to this work.

\*Corresponding author.

E-mail addresses: zhuojiang@whu.edu.cn (Z.Jiang), hanqili1206@whu.edu.cn (H. Li), qiuxinyan@whu.edu.cn (X. Qiu)

## Table of Contents

---

|             |                                                                                 |            |
|-------------|---------------------------------------------------------------------------------|------------|
| Section S1  | Material and Analytical methods                                                 | Page 1-2   |
| Section S2  | Characterizations                                                               | Page 3     |
| Section S3  | Statistical particle size distribution of the MIL-88 series                     | Page 4     |
| Section S4  | Diffuse Reflectance Spectroscopy (DRS) and Mott-Schottky test                   | Page 5-6   |
| Section S5  | Photocatalytic degradation of the CIP series experiments                        | Page 7-9   |
| Section S6  | XRD pattern before and after catalysis                                          | Page 10    |
| Section S7  | TC-HCl degradation experiment                                                   | Page 11    |
| Section S8  | Kinetic fitting of CIP degradation                                              | Page 12    |
| Section S9  | Degradation experiments at low CIP concentration                                | Page 13    |
| Section S10 | Measured DMPO-trapped Electron paramagnetic resonance (EPR) signals             | Page 14    |
| Section S11 | N <sub>2</sub> adsorption analysis                                              | Page 15    |
| Section S12 | Normalized the catalytic activity by the specific surface area                  | Page 16    |
| Section S13 | The fluorescence lifetime, photocurrent and valence band spectrum of MIL-88B, C | Page 17-18 |
| Section S14 | In-situ light-induced XPS                                                       | Page 19    |
| Section S15 | Performance comparison of Fe-MOF in photocatalytic degradation of CIP           | Page 20    |

---

## Section S1. Material and Analytical methods

### Material

Table S1. Chemicals

| Reagent                                                  | Molecular Formula                                                                                | Specification            | Manufacturer                                         |
|----------------------------------------------------------|--------------------------------------------------------------------------------------------------|--------------------------|------------------------------------------------------|
| Hydrochloric acid                                        | HCl                                                                                              | AR, 36-38%               | Sinopharm Chemical Reagent Co., Ltd.                 |
| Ethylenediamine tetraacetic acid disodium salt dihydrate | C <sub>10</sub> H <sub>14</sub> N <sub>2</sub> O <sub>8</sub> Na <sub>2</sub> ·2H <sub>2</sub> O | AR                       | Sinopharm Chemical Reagent Co., Ltd.                 |
| Iron(iii) chloride hexahydrate                           | FeCl <sub>3</sub> ·6H <sub>2</sub> O                                                             | ACS                      | Shanghai Aladdin Biochemical Technology Co., Ltd.    |
| 2,6-naphthalenedicarboxylic acid                         | C <sub>12</sub> H <sub>8</sub> O <sub>4</sub>                                                    | ≥98%(T)                  | Shanghai Aladdin Biochemical Technology Co., Ltd.    |
| Ciprofloxacin                                            | C <sub>17</sub> H <sub>18</sub> FN <sub>3</sub> O <sub>3</sub>                                   | Biotechnology level, 90% | Shanghai Yuanye Biotechnology Co., Ltd.              |
| p-phthalic acid                                          | C <sub>8</sub> H <sub>6</sub> O <sub>4</sub>                                                     | 99%                      | Shanghai Aladdin Biochemical Technology Co., Ltd.    |
| Fumaric acid                                             | C <sub>4</sub> H <sub>4</sub> O <sub>4</sub>                                                     | >99.0%                   | Shanghai TCI Chemical Industry Development Co., Ltd. |
| Ethanol absolute                                         | C <sub>2</sub> H <sub>5</sub> OH                                                                 | AR                       | Sinopharm Chemical Reagent Co., Ltd.                 |
| Methanol                                                 | CH <sub>3</sub> OH                                                                               | AR                       | Sinopharm Chemical Reagent Co., Ltd.                 |
| Sodium hydroxide                                         | NaOH                                                                                             | AR                       | Sinopharm Chemical Reagent Co., Ltd.                 |
| Iron(iii) nitrate nonahydrate                            | Fe(NO <sub>3</sub> ) <sub>3</sub> ·9H <sub>2</sub> O                                             | AR                       | Shanghai Aladdin Biochemical Technology Co., Ltd.    |
| N,N-dimethylformamide                                    | C <sub>3</sub> H <sub>7</sub> NO                                                                 | AR                       | Sinopharm Chemical Reagent Co., Ltd.                 |
| p-benzoquinone                                           | C <sub>6</sub> H <sub>4</sub> O <sub>2</sub>                                                     | HPLC                     | Shanghai Aladdin Biochemical Technology Co., Ltd.    |

|                                 |                                                |         |                                                   |
|---------------------------------|------------------------------------------------|---------|---------------------------------------------------|
| Biphenyl-4,4'-dicarboxylic acid | C <sub>14</sub> H <sub>10</sub> O <sub>4</sub> | ≥97%    | Shanghai Aladdin Biochemical Technology Co., Ltd. |
| Tert-butanol                    | (CH <sub>3</sub> ) <sub>3</sub> COH            | AR      | Sinopharm Chemical Reagent Co., Ltd.              |
| Hydrogen peroxide               | H <sub>2</sub> O <sub>2</sub>                  | AR, 30% | Sinopharm Chemical Reagent Co., Ltd.              |
| Nitric acid                     | HNO <sub>3</sub>                               | AR      | Sinopharm Chemical Reagent Co., Ltd.              |

Ultrapure water was obtained from the lab-based ultrapure water system.

### Analytical methods

The degradation efficiency of CIP is calculated according to the following formula:

$$\text{Degradation rate} = (C_0 - C_t) / C_0 \times 100\%$$

where C<sub>0</sub> represents the concentration of CIP at -15 minutes, and C<sub>t</sub> represents the concentration of CIP at t minutes.

## Section S2. Characterizations

The crystal phase composition of MIL-88 series were characterized by using X-ray diffraction (XRD, Smartlab-9kW, Rigaku Japan) and scanning electron microscopy (SEM, Zeiss GeminiSEM 500, Britain, using voltage of 2 keV). Time-resolved fluorescence spectra were obtained on FLS1000 fluorescence lifetime spectrometer with 365-nm excitation light. The  $O^{2-\bullet}$  and  $\bullet OH$  produced by the photocatalyst were detected by the Electron paramagnetic resonance (EPR, EPR200M, China). The proportion of MOF added to the solution during the test was consistent with that of the experiment. The electronic state and coordination environment of survey spectrum and Fe  $2p$  in the catalyst was characterized by X-ray photoelectron spectroscopy (XPS, ESCALAB Xi+, Thermo Fisher Scientific, America).  $N_2$  adsorption isotherms were measured on iPore 400 instrument (PhysiChem Instruments Ltd). Before the  $N_2$  adsorption measurements, all the samples were fully degassed by heating at 150 °C under vacuum for 8 h. A liquid nitrogen bath (77 K) was used for isotherm measurements. Ultra-high purity grade  $N_2$  was used to the adsorption experiments. UV-vis diffuse reflectance spectra (DRS) were measured on a UV-VIS spectrophotometer UV-2600 (SHIMADZU). The flat-band potentials ( $E_{fb}$ ) of samples were recorded on an electrochemical workstation (CHI 760E) in a typical three-electrode cell filled with 50 mL of a 0.5 M  $Na_2SO_4$  solution. Pt and a saturated Ag/AgCl electrode were used as the counter electrode and the reference electrode, respectively. The working electrode was prepared by deposition 4 mg sample suspension on a fluorine-tin-oxide-coated (FTO coated) glass with area of  $1 \times 1 \text{ cm}^2$ , followed by volatilization the solvent at room temperature. All spin-polarized density functional theory (DFT) calculations were performed using the Vienna Ab-initio Simulation Package (VASP)<sup>1</sup>. The exchange-correlation functional was treated with the generalized gradient approximation (GGA) in the Perdew-Burke-Ernzerhof (PBE) formulation<sup>2</sup>. The projector augmented wave (PAW) method was employed to describe ion-electron interactions. A plane-wave basis set was expanded with a kinetic energy cutoff of 520 eV. For the metal-organic framework system, a large periodic supercell was adopted. Due to the significant lattice dimensions, the Brillouin zone was sampled using a  $\Gamma$ -centered  $2 \times 2 \times 1$  k-point mesh. The convergence criterion for electronic self-consistent field (SCF) cycles was set to  $10^{-6}$  eV. All structures were fully relaxed until the residual interatomic forces were less than 0.02 eV/Å. The Grimme's dispersion correction scheme was employed to account for long-range van der Waals interactions<sup>3</sup>, while the solvation effects were considered using the implicit solvent model, VASPsol<sup>4</sup>. To further investigate the electronic properties, the band-decomposed charge densities of the valence band maximum (VBM) and conduction band minimum (CBM) were extracted using the VASPKIT package. This analysis provides a spatial visualization of the electronic states contributing to the band edges, facilitating an understanding of the charge localization and potential separation mechanisms between the Fe centers and the organic ligands.

### Section S3. Statistical particle size distribution of the MIL-88 series

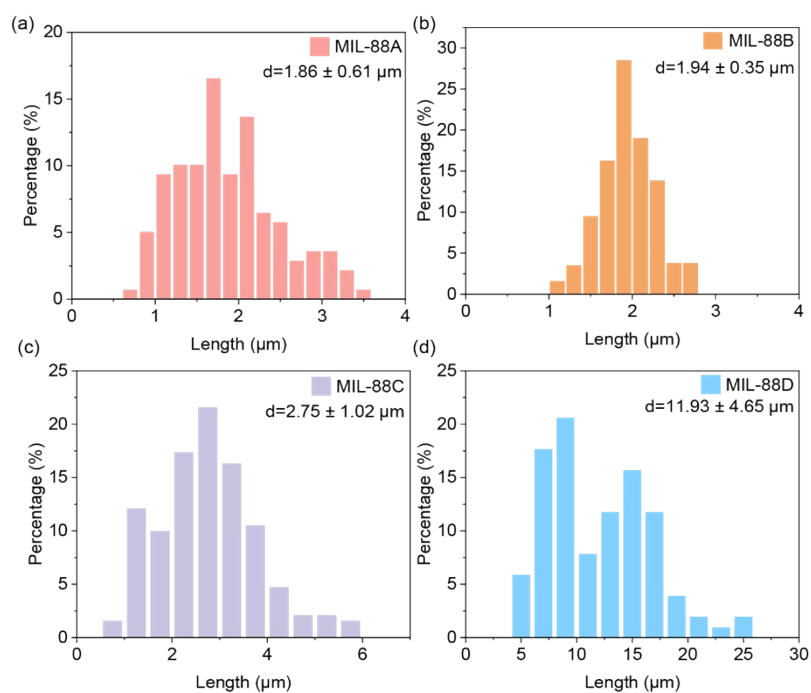

Figure S1. Statistical particle size (length) distribution plot of the MIL-88 series, derived from the statistics of Figure 2a-d.

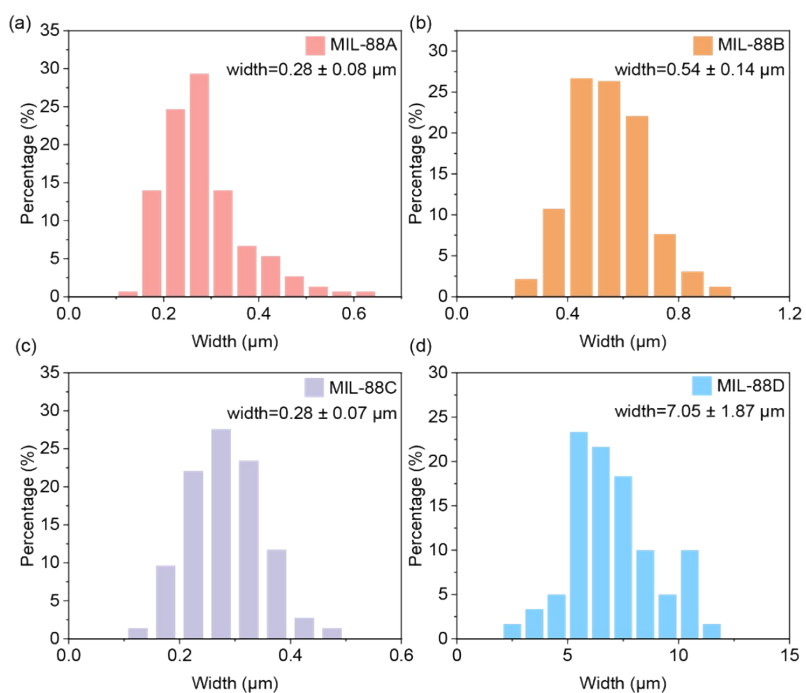

Figure S2. Statistical particle size (width) distribution plot of the MIL-88 series, derived from the statistics of Figure 2a-d.

## Section S4. Diffuse Reflectance Spectroscopy (DRS) and Mott-Schottky test

The band gap of MIL-88-A, -B, -C, -D were derived from their diffuse reflectance spectroscopy (DRS) patterns (Figures 3d). The  $E_{fb}$  value of MIL-88-A, -B, -C, -D were calculated by using the Mott-Schottky relation formula:

$$C^{-2} = (2/\epsilon\epsilon_0 N_d)(V_a - E_{fb} - Kt/e)$$

where  $C$  is the space charge layer capacitance,  $e$  is the electron charge,  $\epsilon$  is the dielectric constant,  $\epsilon_0$  is the permittivity of vacuum,  $N_d$  is the electron donor density, and  $V_a$  is the applied potential. (Figures S1-S4)

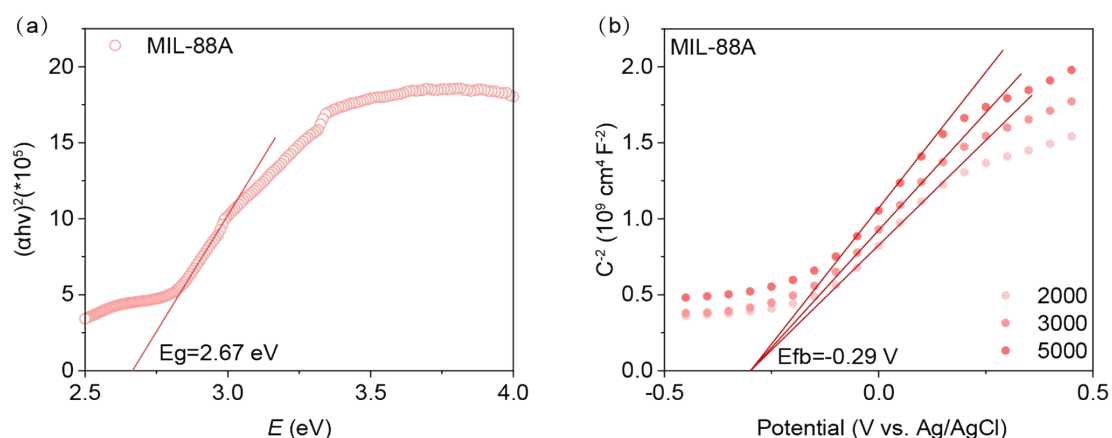

Figure S3. (a) Tauc plot, (b) Mott-Schottky measurement of MIL-88A.

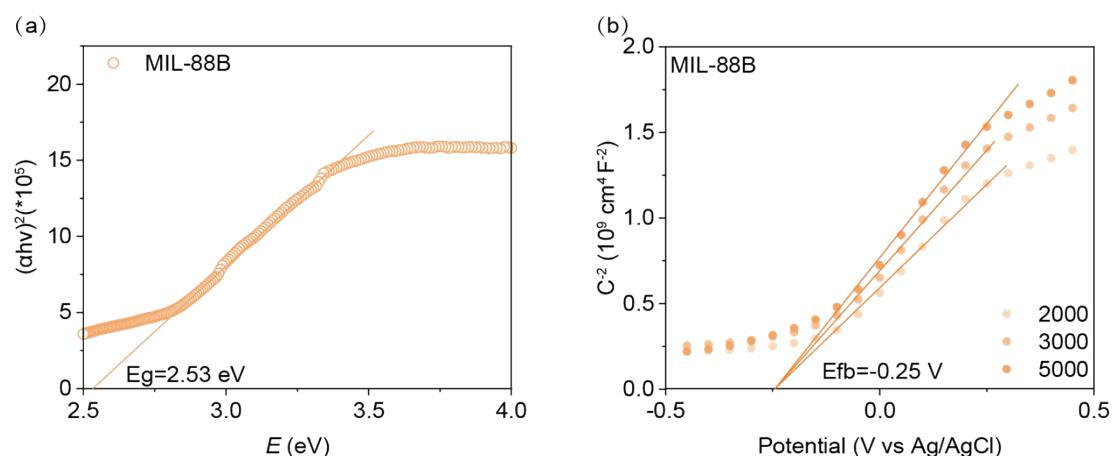

Figure S4. (a) Tauc plot, (b) Mott-Schottky measurement of MIL-88B.

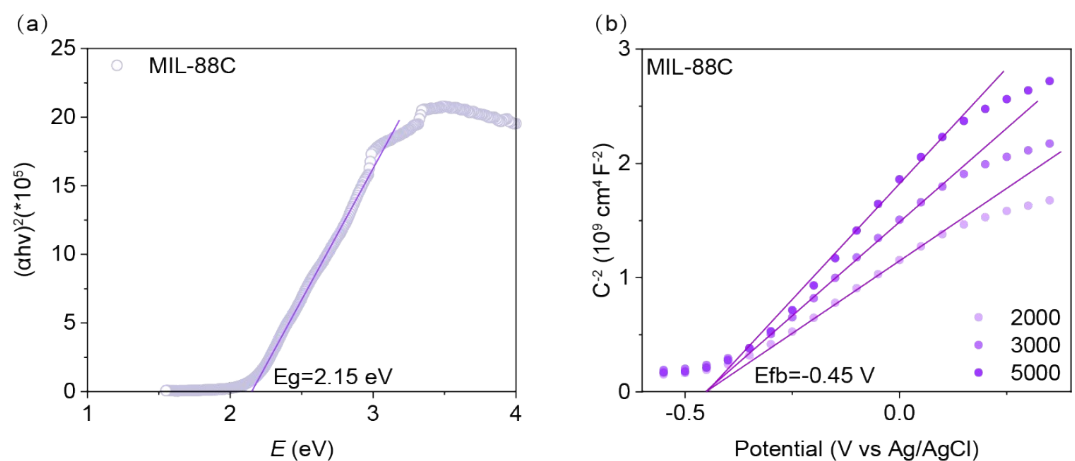

Figure S5. (a) Tauc plot, (b) Mott-Schottky measurement of MIL-88C.

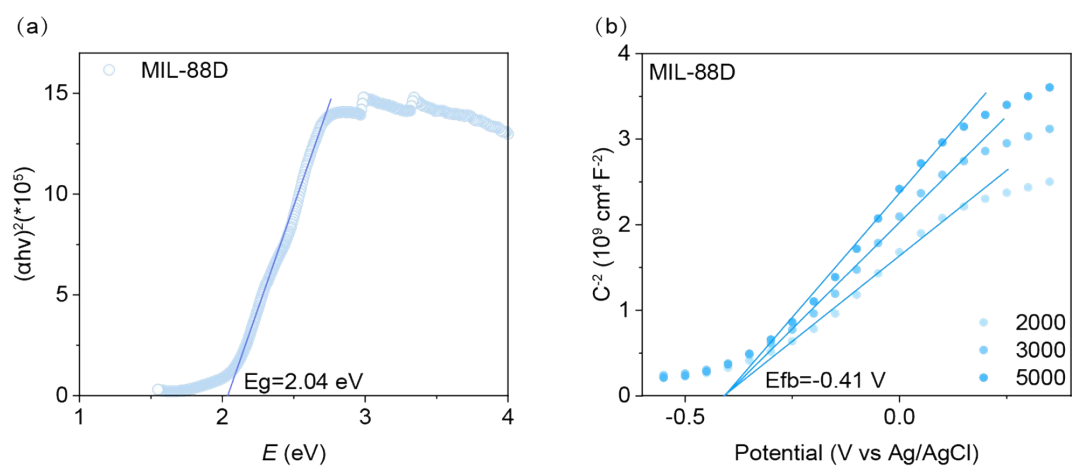

Figure S6. (a) Tauc plot, (b) Mott-Schottky measurement of MIL-88D.

## Section S5. Photocatalytic degradation of the CIP series experiments

If no special instructions are given, the degradation CIP (25ppm, 100mL) experiments are generally conducted in visible light, pH=5, using H<sub>2</sub>O<sub>2</sub> concentration is 1mL/L, and the catalyst mass was 0.1 g/L. The addition amount of the scavenger in the free radical quenching experiment was: BQ: p-benzoquinone, 0.5mM; TBA: tert-butanol, 5mM; MeOH: methanol, 10%vol

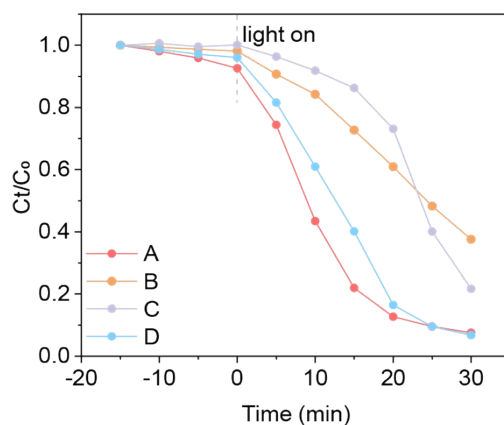

Figure S7. Degradation test of MIL-88-A, -B, -C, -D under the same conditions.

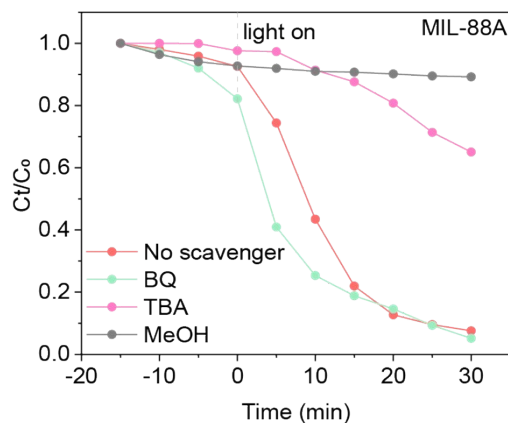

Figure S8. Free radical quenching experiments of MIL-88A with different scavengers.

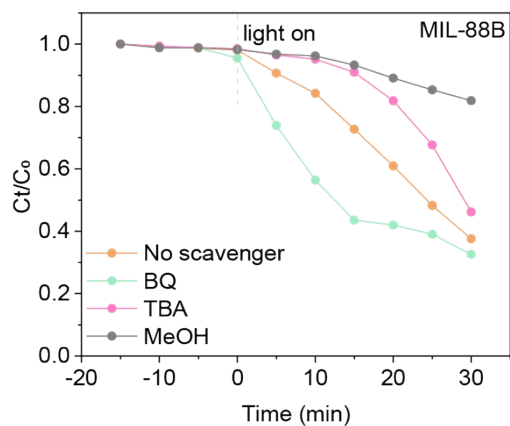

Figure S9. Free radical quenching experiments of MIL-88B with different scavengers.

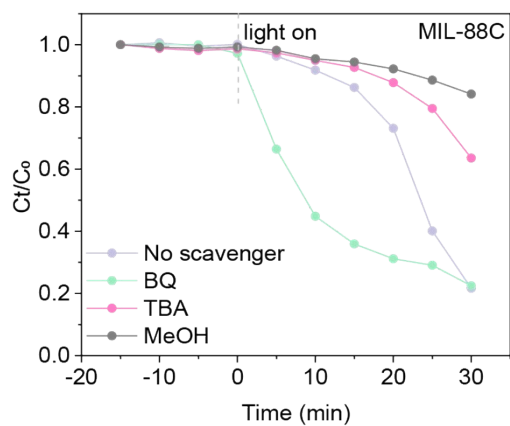

Figure S10. Free radical quenching experiments of MIL-88C with different scavengers.

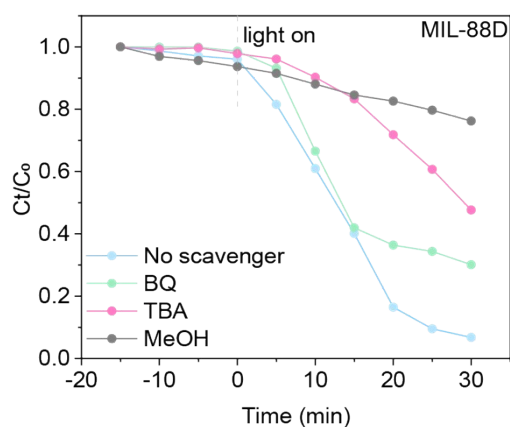

Figure S11. Free radical quenching experiments of MIL-88D with different scavengers.

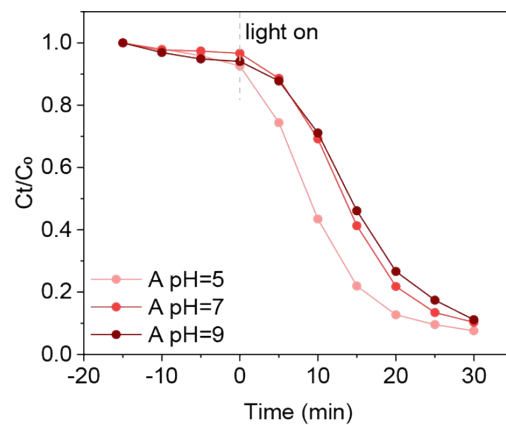

Figure S12. Photocatalytic degradation of MIL-88A at different pH conditions.

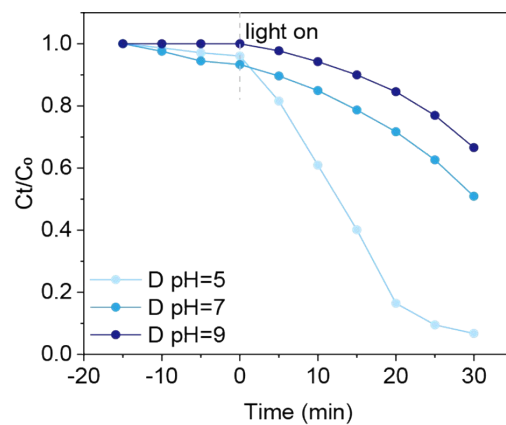

Figure S13. Photocatalytic degradation of MIL-88D at different pH conditions.

## Section S6. XRD pattern before and after catalysis

As shown in Figure S14, the characteristic diffraction peaks of both MIL-88A and MIL-88D remain well preserved after the catalytic reaction, with no noticeable shift in peak positions. This indicates that the crystalline frameworks of both MOFs are well maintained without structural degradation during the reaction. It is worth noting that a slight change in the relative peak intensity within the  $10^{\circ}$ - $12.5^{\circ}$  range is observed for MIL-88A after catalysis. This variation can be attributed to incomplete dehydration of the framework, which leads to a breathing effect commonly observed in MOF materials<sup>5</sup>.

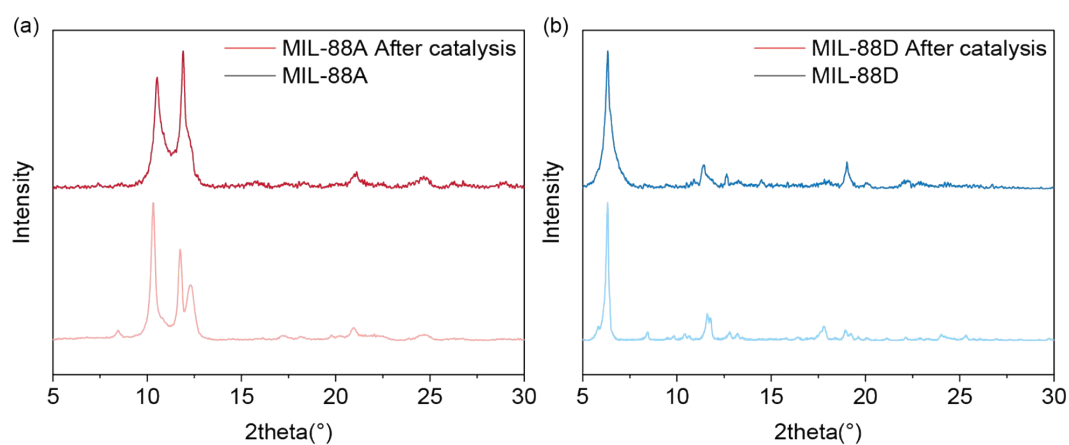

Figure S14 XRD of MIL-88A (a) and MIL-88D (b) before and after catalysis

### Section S7.TC-HCl degradation experiment

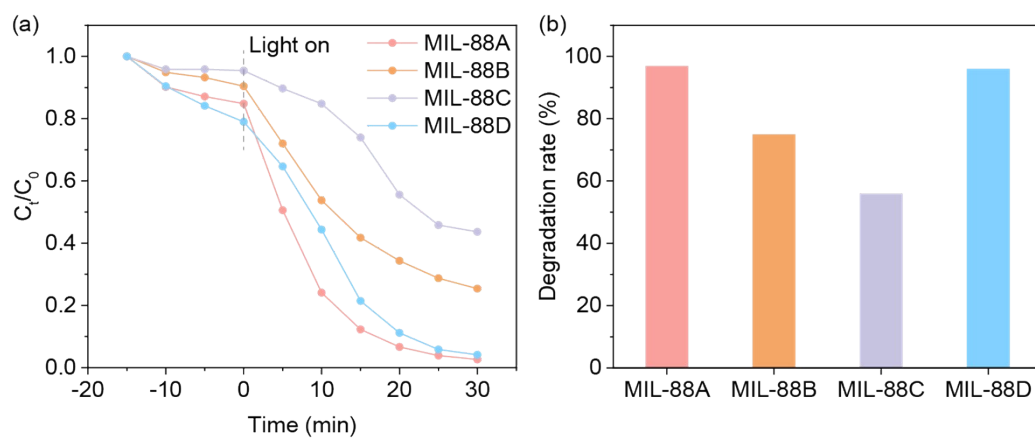

Figure S15. (a) Degradation profiles and (b) degradation efficiencies of the MIL-88 series catalysts toward 25 ppm TC-HCl. The catalyst dosage, solution pH, and  $H_2O_2$  amount were kept consistent with those used in the CIP degradation experiments.

## Section S8. Kinetic fitting of CIP degradation

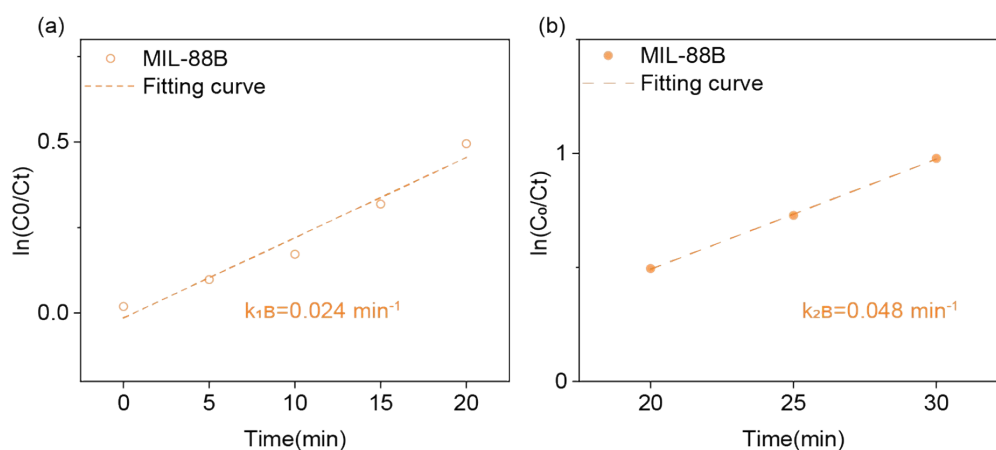

Figure S16. Kinetic fitting of MIL-88B (a) in the first 20 minutes; (b) after 20 minutes.

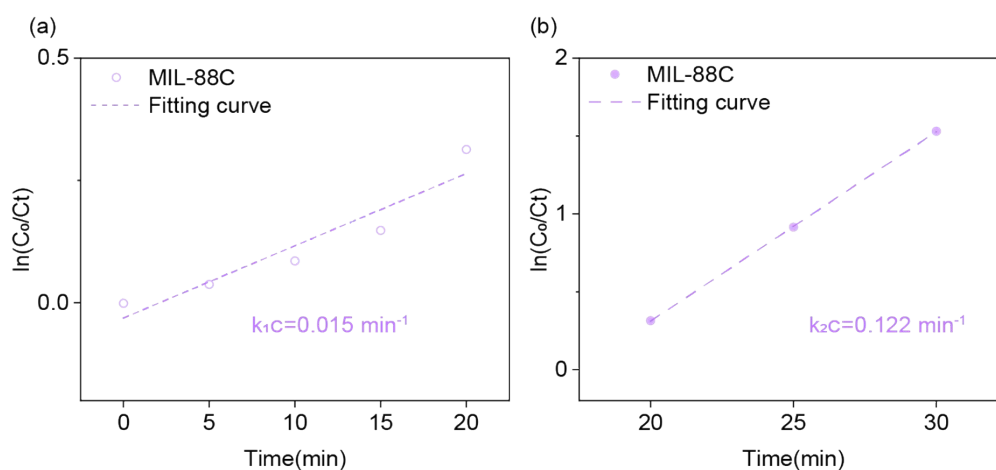

Figure S17. Kinetic fitting of MIL-88C (a) in the first 20 minutes; (b) after 20 minutes.

Table S2. Kinetic fitting constants for the degradation of CIP over time

|                        | MIL-88A | MIL-88B | MIL-88C | MIL-88D |
|------------------------|---------|---------|---------|---------|
| $k_1(\text{min}^{-1})$ | 0.104   | 0.026   | 0.015   | 0.058   |
| $k_2(\text{min}^{-1})$ | 0.052   | 0.048   | 0.122   | 0.118   |

### Section S9. Degradation experiments at low CIP concentration

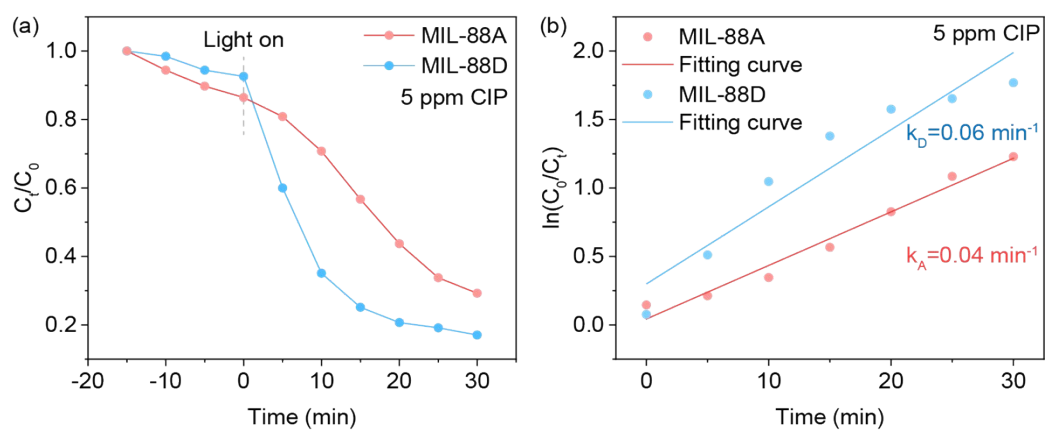

Figure S18. (a) Degradation experiments of MIL-88A and MIL-88D at 5 ppm and (b) Kinetic fitting.

## Section S10. Measured DMPO-trapped Electron paramagnetic resonance (EPR) signals

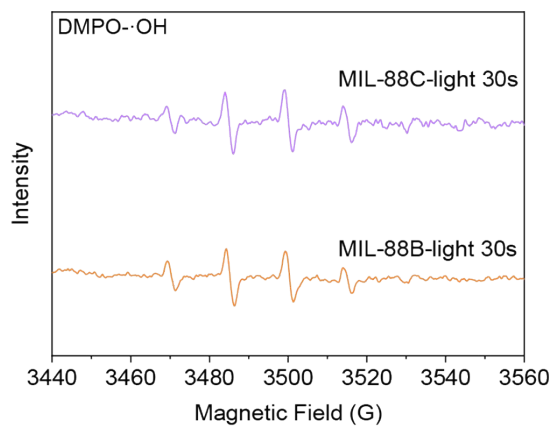

Figure S19.  $\cdot\text{OH}$  radical trapping experiment of MIL-88B and MIL-88C under illumination.

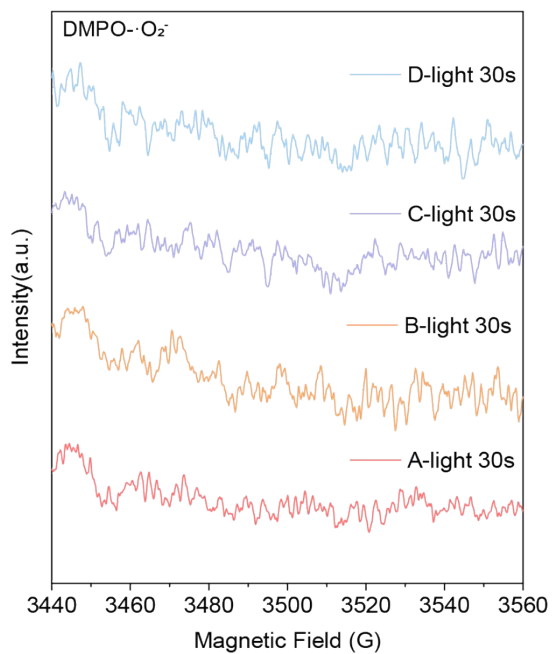

Figure S20.  $\cdot\text{O}_2\cdot$  radical trapping experiment of MIL-88A, B, C, D under illumination.

## Section S11. N<sub>2</sub> adsorption analysis

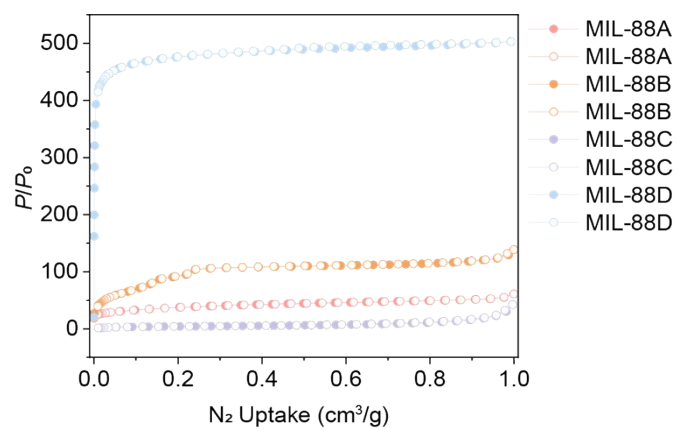

Figure S21. N<sub>2</sub> adsorption analysis of MIL-88A, B, C, D

**Section S12. Normalized the catalytic activity by the specific surface area**

**Table S3. MIL-88 Series normalized the catalytic activity by the specific surface area**

|                                          | <b>MIL-88A</b> | <b>MIL-88B</b> | <b>MIL-88C</b> | <b>MIL-88D</b> |
|------------------------------------------|----------------|----------------|----------------|----------------|
| <b>TON(h<sup>-1</sup>)</b>               | <b>401.07</b>  | <b>271.12</b>  | <b>341.12</b>  | <b>406.37</b>  |
| <b>BET surface area(m<sup>2</sup>/g)</b> | <b>131.81</b>  | <b>359.96</b>  | <b>15.12</b>   | <b>1914.71</b> |
| <b>TON / BET surface area</b>            | <b>3.04</b>    | <b>0.75</b>    | <b>22.56</b>   | <b>0.21</b>    |

**Section S13. The fluorescence lifetime, photocurrent and valence band spectrum of MIL-88-B, -C**

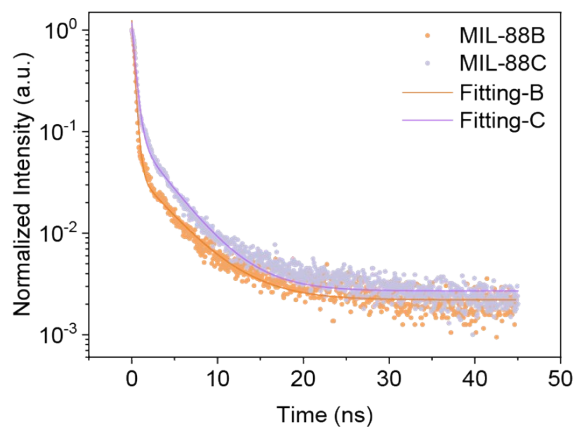

Figure S22. Transient fluorescence decay curves received at 480nm under excitation light of 365nm for MIL-88B and MIL-88C.

Table S4. Transient fluorescence lifetime fitting results

|                   | MIL-88A | MIL-88B | MIL-88C | MIL-88D |
|-------------------|---------|---------|---------|---------|
| $A_1$             | 97%     | 96%     | 93%     | 85%     |
| $\tau_1$ (ns)     | 0.27    | 0.30    | 0.41    | 0.63    |
| $A_2$             | 3%      | 4%      | 7%      | 14%     |
| $\tau_2$ (ns)     | 4.03    | 4.32    | 3.78    | 4.63    |
| $\tau_{ave}$ (ns) | 1.19    | 1.62    | 1.90    | 2.84    |

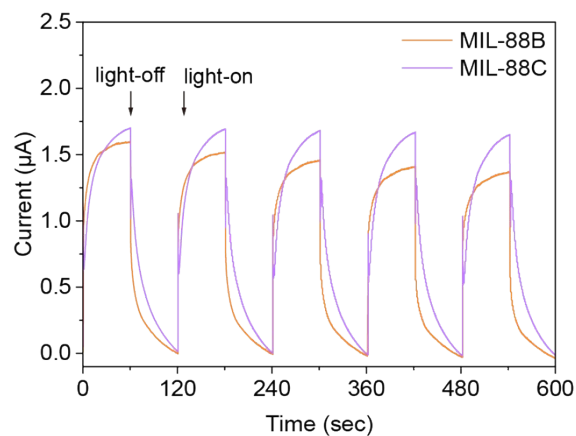

Figure S23. Transient photocurrent responses of MIL-88B and MIL-88C.

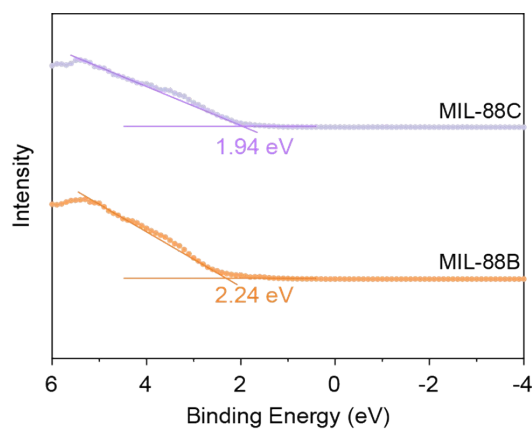

Figure S24. Valence band spectra of MIL-88A and MIL-88D

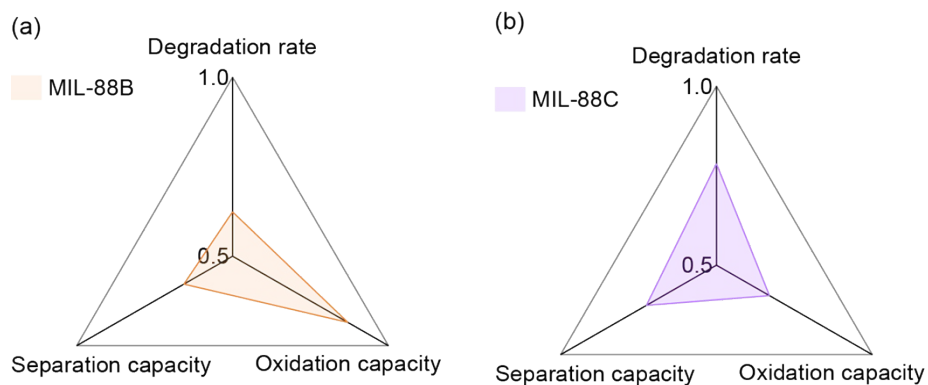

Figure S25. Shows the radar charts based on degradation efficiency, separation efficiency, and oxidation capacity (a) MIL-88B, (b) MIL-88C

### Section S14. In-situ light-induced XPS

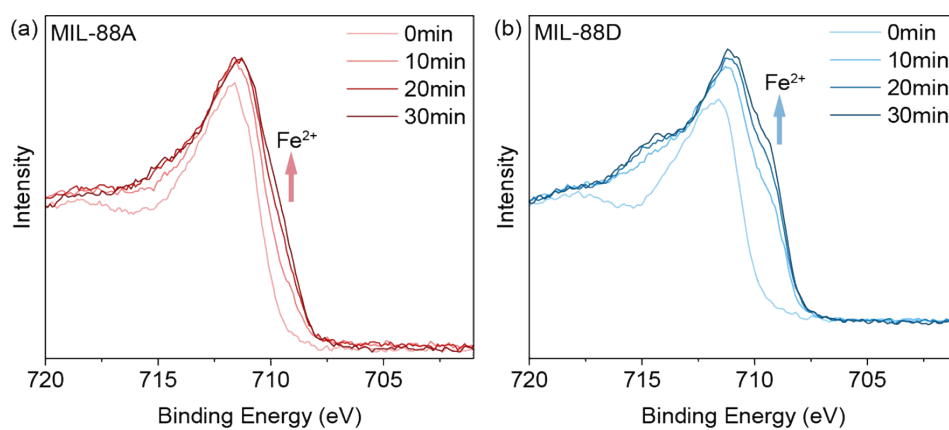

Figure S26. In-situ light-induced XPS of (a)MIL-88A; (b)MIL-88D.

**Section S15. Performance comparison of Fe-MOF in photocatalytic degradation of CIP**

Table S5. Performance comparison of Fe-MOF in photocatalytic degradation of CIP

| <b>MOF</b>                  | <b>Light</b>     | <b>pH</b> | <b>Degradation performance at 30 minutes</b> | <b>Ref.</b> |
|-----------------------------|------------------|-----------|----------------------------------------------|-------------|
| MIL-88A                     | Visible light    | 5         | 92.44%                                       | This work   |
| MIL-88D                     | Visible light    | 5         | 93.25%                                       | This work   |
| MIL-88B                     | Visible light    | 5         | 62.38%                                       | This work   |
| MIL-88C                     | Visible light    | 5         | 78.35%                                       | This work   |
| NH <sub>2</sub> -MIL-101    | Visible light    | 7         | 10.36%                                       | 6           |
| MIL-53(Fe-Cu)               | Visible light    | 4         | 34.23%                                       | 7           |
| Fe-BDC                      | Xenon lamp       | 7         | 33.32%                                       | 8           |
| MIL-100(Fe)                 | Visible light    | 6.96      | 15.81%                                       | 9           |
| UiO-66-on-MIL-101(Fe)/WA    | Ultraviolet lamp | 7         | 54.03%                                       | 10          |
| UiO-66-on-MIL-101(Fe)/WA    | Ultraviolet lamp | 7         | 18.57%                                       | 11          |
| Fe-TCPP-3                   | Visible light    | 7         | 73.00%                                       | 12          |
| MIL-53(Fe)-NH <sub>2</sub>  | Visible light    | 7         | 43.69%                                       | 13          |
| <u>ZIF-67 @ MIL-100(Fe)</u> | Xenon lamp       | 4.3       | 49.40%                                       | 14          |

## References

1. G. Kresse and J. Furthmüller, *Computational Materials Science*, 1996, **6**, 15-50.
2. J. P. Perdew, K. Burke and M. Ernzerhof, *Physical Review Letters*, 1996, **77**, 3865-3868.
3. S. Grimme, *Journal of Computational Chemistry*, 2006, **27**, 1787-1799.
4. K. Mathew, R. Sundararaman, K. Letchworth-Weaver, T. A. Arias and R. G. Hennig, *The Journal of Chemical Physics*, 2014, **140**, 084106.
5. C. Serre, C. Mellot-Draznieks, S. Surblé, N. Audebrand, Y. Filinchuk and G. Férey, *Science*, 2007, **315**, 1828-1831.
6. N. Kaushal, A. A. Taha, S. Tyagi and P. G. Smirniotis, *Mater. Chem. Phys.*, 2025, **332**, 130198.
7. A. Chatterjee, A. K. Jana and J. K. Basu, *New J. Chem.*, 2021, **45**, 17196-17210.
8. V. T. Le, V. A. Tran, D. L. Tran, T. L. H. Nguyen and V.-D. Doan, *Chemosphere*, 2021, **270**, 129417.
9. W.-Q. Li, Y.-X. Wang, J.-Q. Chen, N.-N. Hou, Y.-M. Li, X.-C. Liu, R.-R. Ding, G.-N. Zhou, Q. Li, X.-G. Zhou and Y. Mu, *Appl. Catal. B-Environ. Energy*, 2022, **302**, 120882.
10. Li, X. Zhang, X. Huang, X. Li, Q. Chang, S. Deng and G. Zhu, *J. Water Process. Eng.*, 2024, **63**, 105442.
11. P. Yang, C. Y. Hu, Z. W. Jiang, S. Y. Xiao, X. Y. Wang, C. Z. Huang, Y. F. Li and S. J. Zhen, *J. Colloid Interface Sci.*, 2022, **622**, 690-699.
12. H. Haitosa, L. He, P. Chen, D. M. Kabtamu, O. A. Zelekew and Y.-n. Wu, *J. Environ. Chem. Eng.*, 2025, **13**, 120296.
13. He, M. Lv, H. Dong, Q. Chen, M. Hassan, J. Niu and Z. Gong, *Sep. Purif. Technol.*, 2024, **340**, 126645.
